# Supplementary material for: Effect of carbon nanotube-based catalyst layer surface roughness on polymer electrolyte membrane fuel cell performance
Source: Royal Society of Chemistry journal article supplement (doi:10.1039/d2se00857b), 2022-01-01
Supplement: d2se00857b1.pdf [file d2se00857b1.pdf]

## Supporting Information

for

### **Effect of Carbon Nanotube-based Catalyst Layer Surface Roughness on Polymer Electrolyte Membrane Fuel Cell Performance**

*Yin Kan Phua, Don Terrence Dhammika Weerathunga, Dan Wu, Chaerin Kim, Samindi*

*Madhubha Jayawickrama, Naoki Tanaka, Tsuyohiko Fujigaya*

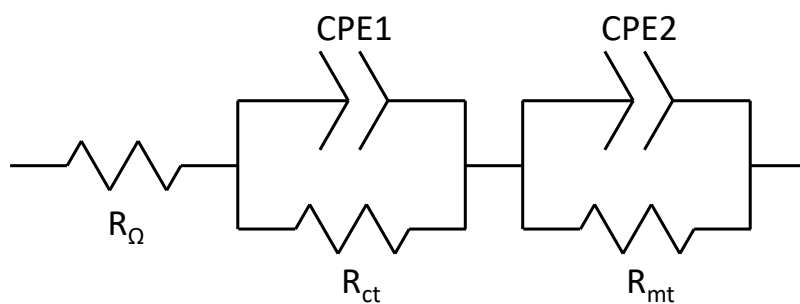

**Figure S1.** Impedance circuit used to evaluate the impedance spectra of the MEAs, where  $R_{\Omega}$  is ohmic resistance,  $R_{ct}$  is charge transfer resistance and  $R_{mt}$  is mass transport resistance.  $R_{ct}$  and  $R_{mt}$  are each in parallel with constant phase element (CPE).

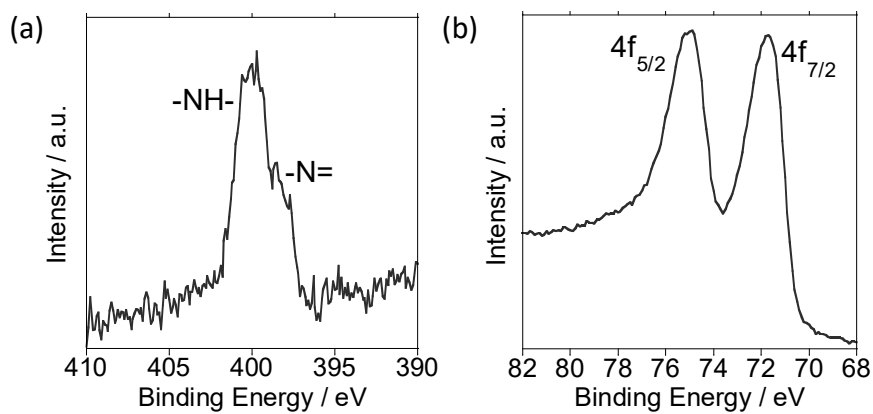

**Figure S2.** XPS survey scans of CNT/PBI/Pt for (a) N 1s and (b) Pt 4f.

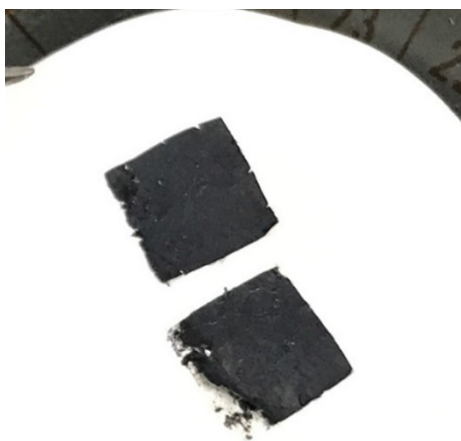

**Figure S3.** Photograph of CNT/PBI/Pt films fabricated using probe sonication in the preparation step.

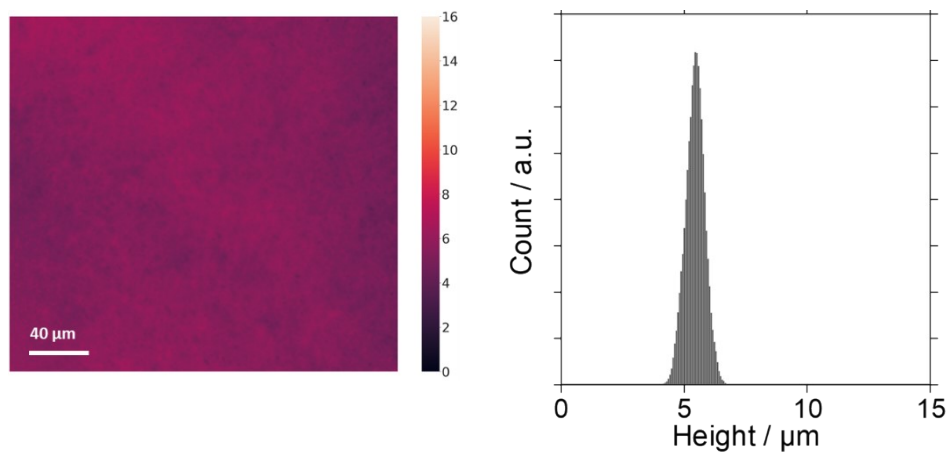

**Figure S4.** Laser microscope image (left) and height distribution (right) of PTFE membrane. Scale bar: 100  $\mu\text{m}$ .

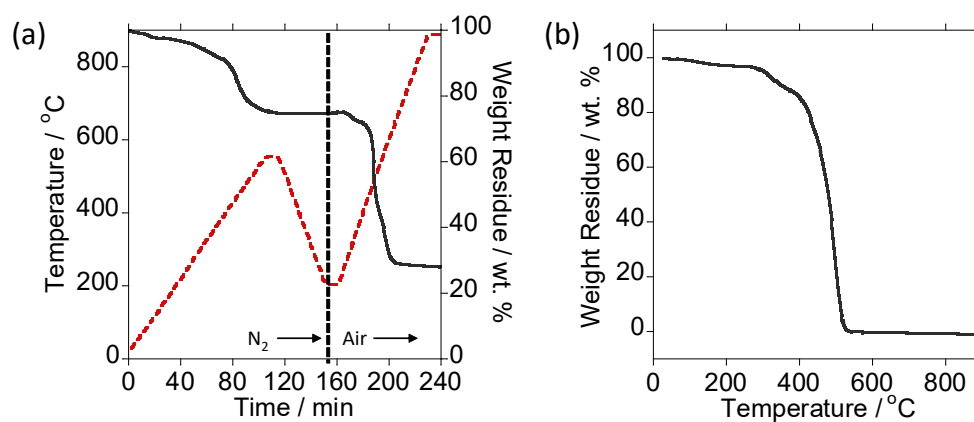

**Figure S5.** TGA curves of (a) CNT/PBI/Pt sheet after Nafion dipping and (b) Nafion obtained from drying 5 wt% Nafion solution.

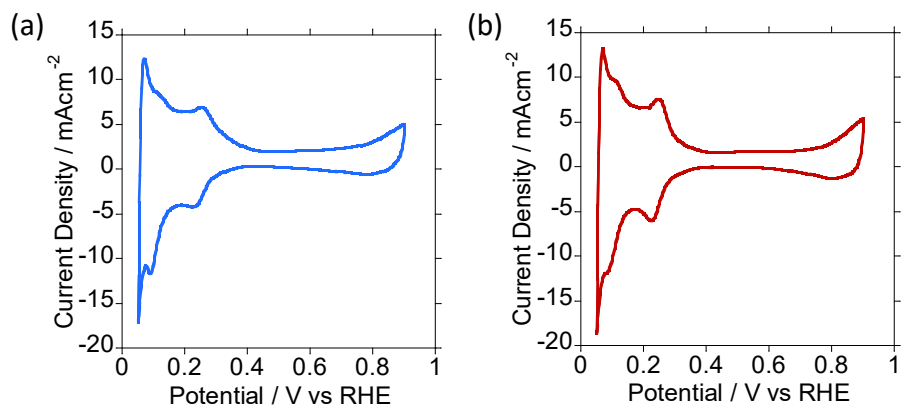

**Figure S6.** In-situ CV curves of (a) top-MEA and (b) bottom-MEA measured at 40 °C and 100% RH.

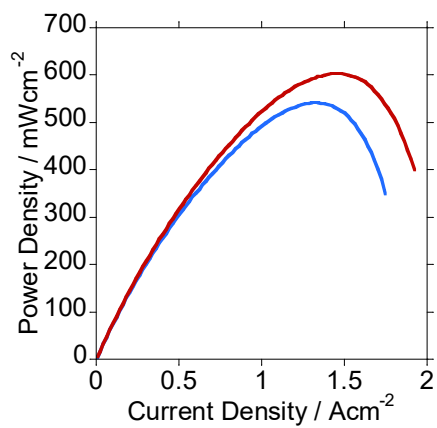

**Figure S7.** Power density curves of top-MEA (blue dotted) and bottom-MEA (red dotted) measured at 80 °C and 100%RH.

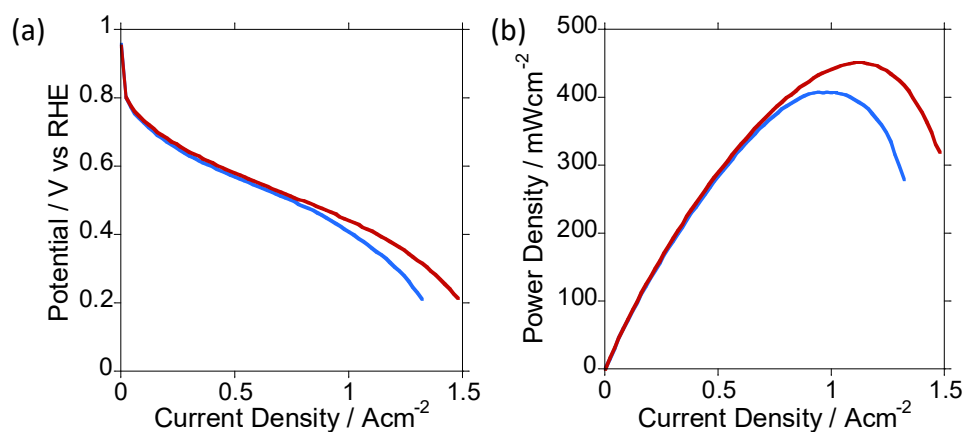

**Figure S8.** (a) Polarization and (b) power density curves of top-MEA (blue) and bottom-MEA (red), both with  $I/C = 0.29$ , measured at 80 °C and 100% R.H.

**Table S1.** Summary of resistance for each CLs evaluated at 80 °C and 100 % RH.

| Current Density / Acm <sup>-2</sup> | $R_{\Omega}$ / Ohm cm <sup>2</sup> | $R_{ct}$ / Ohm cm <sup>2</sup> | $R_{mt}$ / Ohm cm <sup>2</sup> |
|-------------------------------------|------------------------------------|--------------------------------|--------------------------------|
| 0.1                                 | Top-MEA 0.279                      | Top-MEA 1.085                  | Top-MEA 0.309                  |
|                                     | Bottom-MEA 0.144                   | Bottom-MEA 0.589               | Bottom-MEA 0.250               |
| 1.0                                 | Top-MEA 0.159                      | Top-MEA 0.0623                 | Top-MEA 0.630                  |
|                                     | Bottom-MEA 0.135                   | Bottom-MEA 0.0467              | Bottom-MEA 0.319               |
